# Supplementary material
Source: publisher figshare collection journal article supplement (https://karger.figshare.com/ndownloader/files/36476721)
Supplement: Supplementary file 1 [file 36476721]

**Table S1.** Clinical characteristics of the cohort on patient level(mean values ± standard deviation).

|  | Entire cohort  N = 991 children | Boys  N = 555 | Girls  N= 436 | p-value |
| --- | --- | --- | --- | --- |
| Gestational age (weeks) | 38.6 (2.90) | 38.5 (3.01) | 38.6 (2.76) | 0.420 |
| Height mother (cm) | 160 (6.53) | 160 (6.55) | 160 (6.52) | 0.651 |
| Height father (cm) | 173 (7.14) | 173 (7.16) | 173 (7.11) | 0.221 |
| Number of tests | 1.45 (0.56) | 1.45 (0.56) | 1.45 (0.56) | 0.969 |
| GHD |  |  |  | 1.00 |
| No | 667 (67.3%) | 374 (67.4%) | 293 (67.2%) |  |
| Yes | 324 (32.7%) | 181 (32.6%) | 143 (32.8%) |  |

P-values describe differences between boys and girls. Significant association was classified as *p* < 0.05. SDS, standard deviation score; BMI, body mass index.
